# Supplementary material
Source: publisher site journal article supplement (https://www.dovepress.com/article/294312)
Supplement: Supplementary file 1 [file get_supplementary_file.php]

**Supplementary data**


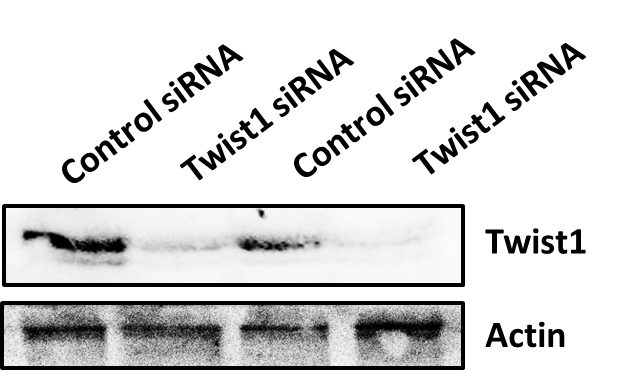


**Figure S1:** Twist1 expression in the SCC4/control-siRNA and SCC4/Twist1-siRNA cells was detected by Western blot assay.


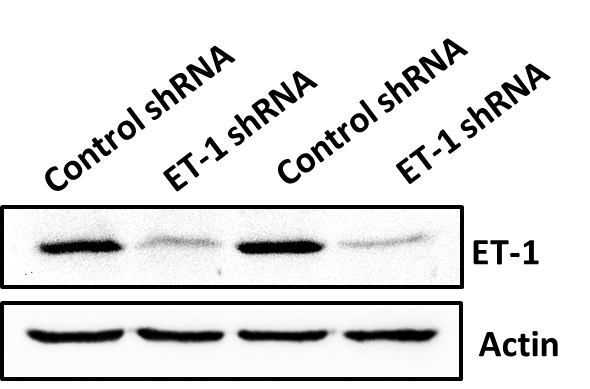


**Figure S2:** ET-1 proteins expression in the SCC4/control-shRNA and SCC4/ET-1-shRNA cells was detected by Western blot assay.

**Figure S3:** ET-1 mRNA expression in the SCC4/control-shRNA and SCC4/ET-1-shRNA cells was detected by q-PCR assay.


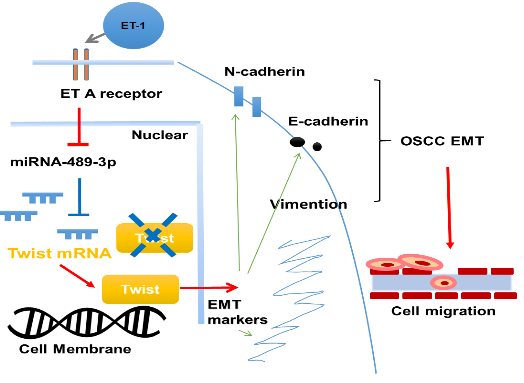


**Figure S4:** A schematic model depicting how ET-1 regulates EMT functioning in OSCC cells. The modeling shows two potential signaling pathways underlying OSCC-derived ET-1 regulation of EMT activation: (1) ET-1 induces Twist1 expression via the ETAR signaling pathway, which in turn activates EMT functioning; (2) ET-1 also inhibits miR-489-3p-induced downregulation of Twist1 mRNA translation and thus stimulates Twsit1 protein expression and EMT activation.

**Table S1: List of mRNA primers**

| mRNA Primer |
| --- |
| Glyceraldehyde-3-phosphate dehydrogenase (GAPDH):  (Forward) 5’-AGCCACATCGCTCAGACAC-3’  (Reverse) 5’-GCCCAATACGACCAAATCC-3’  Endothelin-1(ET-1):  (Forward) 5’-CCGAGCACGTTGTTCCGTAT-3'  (Reverse) 5’-CATGGTCTCCGACCTGGTTT-3'  E-cadherin:  (Forward) 5’-CCCACCACGTACAAGGGTC-3'  (Reverse) 5'-CTGGGGTATTGGGGGCATC-3'  N-cadherin:  (Forward) 5'-CAACTTGCCAGAAAACTCCAGG-3'  (Reverse)5'-ATGAAACCGGGCTATCTGCTC-3'  Twist:  (Forward) 5'-GTCCGCAGTCTTACGAGGAG-3'  (Reverse) 5'-GCTTGAGGGTCTGAATCTTGCT-3'  Vimentin:  (Forward)5'-CGCCAGATGCGTGAAATGG-3'  (Reverse)5'-ACCAGAGGGAGTGAATCCAGA-3' |

**Table S2: List of miRNA primer**s

| microRNA primer |
| --- |
| miR-27a: 5’-TTCACAGTGGCTAAGTTCCGC-3’  miR-27b: 5’-TTCACAGTGGCTAAGTTCTGC-3’  miR-33a: 5’-GTGCATTGTAGTTGCATTGCA-3’  miR-33b: 5’-GTGCATTGCTGTTGCATTGC-3’  miR-300: 5’-TATACAAGGGCAGACTCTCTCT-3’  miR-410: 5’-AATATAACACAGATGGCCTGT-3’  miR-494: 5’-TGAAACATACACGGGAAACCTC-3’ |
